# Supplementary material for: Germline variations at JAK2, TERT, HBS1L-MYB and MECOM and the risk of myeloproliferative neoplasms in Taiwanese population
Source: PubMed Central journal article supplement (PMC5652698; doi:10.18632/oncotarget.19211), 2017-07-12
Supplement: oncotarget-08-76204-s001.pdf [file oncotarget-08-76204-s001.pdf]

## **Germline variations at *JAK2*, *TERT*, *HBS1L-MYB* and *MECOM* and the risk of myeloproliferative neoplasms in Taiwanese population**

### **SUPPLEMENTARY MATERIALS**

**Supplementary Table 1: The distribution and the association of the five SNPs in MPN patients stratified by mutation profiles and disease subtypes**

See Supplementary File 1

**Supplementary Table 2: Clinical and prognostic implications of the five SNPs in 178 Taiwanese MPN patients**

See Supplementary File 1

Supplementary Table 3: Primer sequences for the five SNPs used in Sanger sequencing and HRMA

| SNPs       | Experiment        | Direction | Primer sequence (5' to 3')                       | Annealing temperature |
|------------|-------------------|-----------|--------------------------------------------------|-----------------------|
| rs12343867 | Sanger sequencing | Forward   | CTGGAATTATGAAGACAAAGCA                           | 55-60 °C              |
|            |                   | Reverse   | GCATGGGGTACGATTTATACTT                           |                       |
|            | HRMA              | Forward   | <b>GCGGGCAGGGCGGC</b> TTTAATGGAAGTACAGAAATGATTAC | 63 °C                 |
|            |                   | Reverse   | CTGTGAACACCTAAATTTAGCCAAAAAATA                   |                       |
| rs12339666 | Sanger sequencing | Forward   | tggccaagaatatgctgt                               | 56-60 °C              |
|            |                   | Reverse   | aaaacagggcaaacatgaga                             |                       |
|            | HRMA              | Forward   | <b>GCGGGCAGGGCGGC</b> TGAAATTTGTATTGAGAAGTCCAA   | 56 °C                 |
|            |                   | Reverse   | CCTTTGTATCTAGCTTTATTTTCATTTTCT                   |                       |
| rs2201862  | Sanger sequencing | Forward   | ggaacttctggaaactgga                              | 60 °C                 |
|            |                   | Reverse   | acatggaagctgccaagact                             |                       |
|            | HRMA              | Forward   | <b>GCGGGCAGGGCGGC</b> AAATTTGCATAAGTAACTTGGAGCTG | 63 °C                 |
|            |                   | Reverse   | CCTGCAGACATTTTCCCCATTGTC                         |                       |
| rs9376092  | Sanger sequencing | Forward   | GATCACCCATCCATTCATCC                             | 58-60 °C              |
|            |                   | Reverse   | ACCCTGCACCAGTTACATGC                             |                       |
|            | HRMA              | Forward   | <b>GCGGGCAGGGCGGC</b> GGCCAACATTGTTTCGTCTTTG     | 56 °C                 |
|            |                   | Reverse   | TGGGAGGTAGCTCATATGAAGAAGACAGGC                   |                       |
| rs2736100  | Sanger sequencing | Forward   | GCTGTTTTCCCTGCTGACTT                             | 56-60 °C              |
|            |                   | Reverse   | ACGTTGCTGTCACTCACTGG                             |                       |
|            | HRMA              | Forward   | TGACACCCCCACAAGCTAAG                             | 56-63 °C              |
|            |                   | Reverse   | GGGAACAAAGGAGGAAAAGC                             |                       |
